# Supplementary material for: Nebivolol, a β1-adrenergic blocker, protects from peritoneal membrane damage induced during peritoneal dialysis
Source: PubMed Central journal article supplement (PMC5058669; doi:10.18632/oncotarget.8780), 2016-04-18
Supplement: oncotarget-07-30133-s001.pdf [file oncotarget-07-30133-s001.pdf]

## **Nebivolol, a $\beta_1$ -adrenergic blocker, protects from peritoneal membrane damage induced during peritoneal dialysis**

### **Supplementary Material**

**Table S1: Specific human primers for quantitative RT-PCR**

| <b>Gene</b>   | <b>Forward primer</b>     | <b>Reverse primer</b>     |
|---------------|---------------------------|---------------------------|
| E-Cadherin    | 5'TAAGGTGACAGAGCCTCTG3'   | 5'TGGGTGAATTCGGGCTTGTT3'  |
| Fibronectin   | 5'CCTGAAGCTGAAGAGACTTGC3' | 5'CGTTTCTCCGACCACATAGGA3' |
| Pro-collagen  | 5'GCTATGATGAGAAATCAACCG3' | 5'GCTTCCCCATCATCTCCATTC3' |
| $\alpha$ -SMA | 5'CCGACCGAATGCAGAAGGA3'   | 5'ACAGAGTATTTGCGCTCCGAA3' |
| Snail         | 5'GCAGAAGGAGGAGGGCAGAAT3' | 5'TATGTGCTGGCCTTGGTGAGG3' |
| Histone H3    | 5'AAAGCCGCTCGCAAGAGTGCG3' | 5'ACTTGCCTCCTGCAAAGCAC3'  |
